1 **Table S1 Statistics of pair-wise post hoc tests between an nual-cycle stages by genotypic group.** In the comparison among genotypic groups the  
 2 interaction term genotypic group\*annual-cycle stage was not significant for haptoglobin, and results are not shown.

|                         | Kazakh   |          | Kazakh x European |          | European |           | European x Kenyan |       | Kenyan   |      |
|-------------------------|----------|----------|-------------------|----------|----------|-----------|-------------------|-------|----------|------|
|                         | z -value | P        | z -value          | P        | z -value | P         | z -value          | P     | z -value | P    |
| <b>Hemagglutination</b> |          |          |                   |          |          |           |                   |       |          |      |
| Spring-Breeding         | 0.40     | 0.99     | 1.09              | 0.81     | 2.25     | 0.15      | 1.41              | 0.61  | 0.31     | 1.00 |
| Breeding-Moult          | 0.65     | 0.97     | 0.79              | 0.93     | 1.48     | 0.57      | 1.26              | 0.71  | 1.01     | 0.85 |
| Moult-Autumn            | 2.78     | 0.04*    | 3.97              | <0.001** | 0.91     | 0.89      | 2.03              | 0.25  | 0.98     | 0.86 |
| Autumn-Winter           | 3.62     | 0.003**  | 3.68              | 0.002**  | 0.67     | 0.96      | 2.80              | 0.04* | 0.25     | 1.00 |
| Winter-Spring           | 0.32     | 1.00     | 1.48              | 0.57     | 0.24     | 1.00      | 3.19              | 0.01* | 0.14     | 1.00 |
| Spring-Moult            | 0.39     | 0.99     | 2.18              | 0.18     | 0.59     | 0.98      | 2.54              | 0.08  | 1.33     | 0.67 |
| Breeding-Autumn         | 3.19     | 0.01*    | 2.78              | 0.04*    | 2.23     | 0.16      | 0.81              | 0.92  | 0.02     | 1.00 |
| Moult-Winter            | 0.17     | 1.00     | 1.15              | 0.77     | 0.43     | 0.99      | 0.29              | 1.00  | 1.41     | 0.62 |
| Spring-Autumn           | 3.65     | 0.002**  | 2.11              | 0.21     | 0.49     | 0.99      | 0.64              | 0.97  | 0.33     | 1.00 |
| Breeding -Winter        | 0.62     | 0.97     | 0.08              | 1.00     | 2.15     | 0.19      | 1.81              | 0.36  | 0.23     | 1.00 |
| <b>Hemolysis</b>        |          |          |                   |          |          |           |                   |       |          |      |
| Spring-Breeding         | 1.38     | 0.63     | 0.41              | 0.99     | 2.40     | 0.11      | 0.71              | 0.95  | 0.19     | 1.00 |
| Breeding-Moult          | 0.30     | 1.00     | 0.10              | 1.00     | 0.52     | 0.99      | 0.35              | 1.00  | 0.17     | 1.00 |
| Moult-Autumn            | 5.95     | <0.001** | 3.12              | 0.02*    | 3.36     | 0.007**   | 0.96              | 0.87  | 1.63     | 0.47 |
| Autumn-Winter           | 7.56     | <0.001** | 3.90              | <0.001** | 3.80     | 0.001**   | 2.38              | 0.12  | 1.82     | 0.36 |
| Winter-Spring           | 2.15     | 0.19     | 0.84              | 0.91     | 3.95     | < 0.001** | 2.24              | 0.16  | 0.13     | 1.00 |
| Spring-Moult            | 1.27     | 0.70     | 0.59              | 0.98     | 3.00     | 0.02*     | 1.01              | 0.85  | 0.02     | 1.00 |
| Breeding-Autumn         | 5.51     | <0.001** | 2.71              | 0.051    | 2.82     | 0.04*     | 0.64              | 0.97  | 1.82     | 0.36 |
| Moult-Winter            | 0.40     | 1.00     | 0.07              | 1.00     | 0.15     | 1.00      | 1.18              | 0.76  | 0.14     | 1.00 |
| Spring-Autumn           | 5.51     | <0.001** | 2.81              | 0.04*    | 0.99     | 0.85      | 0.12              | 1.00  | 1.67     | 0.45 |
| Breeding -Winter        | 0.02     | 1.00     | 0.18              | 1.00     | 0.45     | 0.99      | 1.63              | 0.47  | 0.33     | 1.00 |

3

4 **Table S1 continued**

5

|                                                     | Kazakh   |          | Kazakh x<br>European |          | European |          | European x<br>Kenyan |          | Kenyan   |          |
|-----------------------------------------------------|----------|----------|----------------------|----------|----------|----------|----------------------|----------|----------|----------|
|                                                     | z -value | P        | z -value             | P        | z -value | P        | z -value             | P        | z -value | P        |
| <b>Bactericidal ability against <i>E.coli</i></b>   |          |          |                      |          |          |          |                      |          |          |          |
| Spring-Breeding                                     | 0.82     | 0.92     | 4.71                 | <0.001** | 5.02     | <0.001** | 4.28                 | <0.001** | 2.12     | 0.20     |
| Breeding-Moult                                      | 0.23     | 1.00     | 0.22                 | 1.00     | 0.11     | 1.00     | 1.49                 | 0.56     | 1.71     | 0.42     |
| Moult-Autumn                                        | 4.48     | <0.001** | 1.34                 | 0.66     | 1.80     | 0.37     | 1.85                 | 0.34     | 0.80     | 0.93     |
| Autumn-Winter                                       | 5.09     | <0.001** | 1.45                 | 0.59     | 1.62     | 0.48     | 2.49                 | 0.09     | 3.86     | 0.001**  |
| Winter-Spring                                       | 1.99     | 0.27     | 4.84                 | <0.001** | 5.21     | <0.001** | 5.95                 | <0.001** | 4.01     | <0.001** |
| Spring-Moult                                        | 1.17     | 0.76     | 4.97                 | <0.001** | 4.73     | <0.001** | 2.71                 | 0.05     | 0.49     | 0.99     |
| Breeding-Autumn                                     | 3.32     | 0.008**  | 0.96                 | 0.87     | 1.73     | 0.41     | 0.58                 | 0.98     | 0.95     | 0.87     |
| Moult-Winter                                        | 0.49     | 0.99     | 0.09                 | 1.00     | 0.46     | 0.99     | 4.20                 | <0.001** | 4.31     | <0.001** |
| Spring-Autumn                                       | 3.12     | 0.02*    | 3.38                 | 0.006**  | 2.36     | 0.12     | 4.15                 | <0.001** | 1.17     | 0.77     |
| Breeding -Winter                                    | 0.69     | 0.96     | 0.15                 | 1.00     | 0.36     | 1.00     | 3.07                 | 0.0177 * | 2.84     | 0.03*    |
| <b>Bactericidal ability against <i>S.aureus</i></b> |          |          |                      |          |          |          |                      |          |          |          |
| Spring-Breeding                                     | 2.82     | 0.04*    | 1.24                 | 0.73     | 2.22     | 0.17     | 0.28                 | 1.00     | 0.16     | 1.00     |
| Breeding-Moult                                      | 2.88     | 0.03*    | 1.43                 | 0.60     | 0.78     | 0.94     | 3.27                 | 0.009**  | 2.53     | 0.08     |
| Moult-Autumn                                        | 3.47     | 0.005**  | 2.56                 | 0.08     | 2.45     | 0.10     | 2.46                 | 0.10     | 3.23     | 0.01 *   |
| Autumn-Winter                                       | 2.50     | 0.09     | 0.54                 | 0.98     | 0.47     | 0.99     | 1.81                 | 0.36     | 0.32     | 1.00     |
| Winter-Spring                                       | 2.24     | 0.16     | 1.75                 | 0.40     | 0.51     | 0.99     | 0.67                 | 0.96     | 0.66     | 0.96     |
| Spring-Moult                                        | 0.60     | 0.97     | 0.29                 | 1.00     | 2.96     | 0.03*    | 2.81                 | 0.04*    | 1.91     | 0.31     |
| Breeding-Autumn                                     | 5.73     | <0.001** | 0.83                 | 0.92     | 1.75     | 0.40     | 0.43                 | 0.99     | 0.90     | 0.90     |
| Moult-Winter                                        | 1.18     | 0.76     | 2.18                 | 0.18     | 2.30     | 0.14     | 4.52                 | <0.001** | 3.27     | 0.009**  |
| Spring-Autumn                                       | 4.36     | <0.001** | 2.04                 | 0.24     | 0.09     | 1.00     | 0.55                 | 0.98     | 0.85     | 0.91     |
| Breeding -Winter                                    | 4.31     | <0.001** | 0.45                 | 0.99     | 1.53     | 0.53     | 1.34                 | 0.65     | 0.67     | 0.96     |

6

7

8 **Table S2 Statistics of pair-wise post hoc tests between annual-cycle stages by treatment group.** In the comparison between treatment groups the  
 9 interaction annual-cycle stage\*treatment was significant for hemolysis and bactericidal ability against *E.coli*, and we only performed a post-hoc test on  
 10 these indices.

|                                                   | Temperature treatment |           |          |          |
|---------------------------------------------------|-----------------------|-----------|----------|----------|
|                                                   | Constant              |           | Variable |          |
|                                                   | z -value              | P         | z -value | P        |
| <b>Hemolysis</b>                                  |                       |           |          |          |
| Spring-Breeding                                   | 2.40                  | 0.11      | 0.64     | 0.97     |
| Breeding-Moult                                    | 0.52                  | 0.99      | 0.47     | 0.99     |
| Moult-Autumn                                      | 3.36                  | 0.007**   | 2.13     | 0.20     |
| Autumn-Winter                                     | 3.80                  | 0.001**   | 0.40     | 0.99     |
| Winter-Spring                                     | 3.95                  | < 0.001** | 0.71     | 0.95     |
| Spring-Moult                                      | 3.00                  | 0.02*     | 1.13     | 0.79     |
| Breeding-Autumn                                   | 2.82                  | 0.04*     | 1.54     | 0.53     |
| Moult-Winter                                      | 0.15                  | 1.00      | 2.42     | 0.11     |
| Spring-Autumn                                     | 0.99                  | 0.85      | 0.93     | 0.88     |
| Breeding -Winter                                  | 0.45                  | 0.99      | 1.58     | 0.50     |
| <b>Bactericidal ability against <i>E.coli</i></b> |                       |           |          |          |
| Spring-Breeding                                   | 5.02                  | <0.001**  | 2.89     | 0.03*    |
| Breeding-Moult                                    | 0.11                  | 1.00      | 1.91     | 0.31     |
| Moult-Autumn                                      | 1.79                  | 0.37      | 0.40     | 0.99     |
| Autumn-Winter                                     | 1.62                  | 0.48      | 0.53     | 0.98     |
| Winter-Spring                                     | 5.21                  | <0.001**  | 5.05     | <0.001** |
| Spring-Moult                                      | 4.73                  | <0.001**  | 4.79     | <0.001** |
| Breeding-Autumn                                   | 1.73                  | 0.41      | 1.43     | 0.61     |
| Moult-Winter                                      | 0.46                  | 0.99      | 0.13     | 1.00     |
| Spring-Autumn                                     | 2.36                  | 0.12      | 4.52     | <0.001** |
| Breeding -Winter                                  | 0.36                  | 1.00      | 1.95     | 0.29     |
